# Supplementary material for: Living polymerization and block copolymerization of alpha-olefins by an amine bis(phenolate) titanium catalyst.
Source: Royal Society of Chemistry journal article supplement (doi:10.1039/b105492a), 2001-10-02
Supplement: b105492aesi2.doc [file b105492aesi2.doc]

† **Preparation of** **1a**. A solution of **1** (0.4 mmol) in diethyl ether (2 mL) was added dropwise to a solution of titanium tetra(isopropoxide) (0.4 mmol) in diethyl ether (2 mL) at room temperature under a nitrogen atmosphere. The color changed from colorless to yellow. The reaction mixture was stirred for two hours, after which the released isopropanol and the solvent were removed under vacuum. The product was dissolved in dichloromethane (2 mL) and two equiv of TMS-Cl as a 1M solution in dichloromethane were added. The reaction mixture was stirred for two hours, during which a color change to orange was observed, and the volatiles were removed under vacuum. The product was dissolved in diethyl ether (5 mL), and two equiv of benzyl magnesium chloride as a 1M solution in diethyl ether were added. The reaction mixture was stirred for an additional two hours and the MgCl2 was filtered. Removing the volatiles under vacuum gave **1a** in total 95% yield as a dark red crystalline solid, which may be recrystallized from diethyl ether. 1H NMR (C6D6)  7.88 (d, *J* = 7.5 Hz, 2H), 7.71 (s, 2H), 7.35 (t, *J* = 7.5 Hz, 2H), 7.07 (t, *J* = 7.7 Hz, 1H), 6.95 (m, 4H), 6.65 (t, *J* = 7.4 Hz, 2H), 6.51 (t, *J* = 7.3 Hz, 1H), 3.52 (s, 2H, PhC*H*2), 3.28 (s, 2H, PhC*H*2), 2.98 (d, *J* = 13.4 Hz, 2H, ArC*H*2), 2.48 (d, *J* = 13.5 Hz, 2H, ArC*H*2), 2.27 (s, 3H, OC*H*3), 2.14 (s, 18H, C(C*H*3)3), 2.13 (m, 2H, C*H*2), 1.69 (m, 2H, C*H*2), 1.38 (s, 18H, C(C*H*3)3). 13C NMR (C6D6)  160.8, 153.8, 147.1, 141.6, 136.3, 129.7, 129.3, 128.9, 127.2, 126.5, 124.6, 124.3, 122.3, 122.2, 98.2 (Ph*C*H2), 86.0 (Ph*C*H2), 71.5 (O*C*H3), 65.0 (Ar*C*H2), 59.1 (*C*H2), 51.1 (*C*H2), 36.0 (*C*(CH3)3), 34.4 (*C*(CH3)3), 31.9 (C(*C*H3)3), 31.0 (C(*C*H3)3).

‡ *Crystal data* forC47H65NO3Ti·(C4H10O) **1a**: *M* = 814.02, orthorhombic space group *Pbca* *a* = 19.2070(2), *b* = 18.3170(2), *c* = 27.2650(5) Å, *U* = 9592.2(2) Å3, *Z* = 8, *Dc* = 1.127 g cm-3, (Mo -K) = 0.220 mm-1, *T* = 110 K, Nonius Kappa CCD, 8757 unique reflections were measured. The structure was solved by a combination of direct methods and Fourier techniques using the SIR-92 and DIRDIF-96 software,11 and were refined by full-matrix least-squares with SHELXL-97.12 In the structure one of the *t*-Bu groups was found to be disordered, and the asymmetric unit contains one molecule of disordered diethyl ether. The final refinement converged at *R*1 = 0.055 and *wR*2 = 0.104 for 5741 observations with [*I* > 2*(I)*] and *R*1 = 0.111 and *wR*2= 0.128 for all data.
